# Supplementary material for: Multicenter interactions and ligand field effects in platinum( ii ) tripyrrindione radicals
Source: Royal Society of Chemistry journal article supplement (doi:10.1039/d3dt00894k), 2023-01-01
Supplement: d3dt00894k1.pdf [file d3dt00894k1.pdf]

## **Supplementary Information**

### **Multicenter interactions and ligand field effects in platinum(II) tripyrrindione radicals**

Elisa Tomat,<sup>\*a</sup> Clayton J. Curtis,<sup>a</sup> Andrei V. Astashkin,<sup>a</sup> Jeanet Conradie,<sup>b,c</sup> and Abhik Ghosh<sup>\*c</sup>

- a) Department of Chemistry and Biochemistry, The University of Arizona, 1306 E. University Blvd., Tucson, AZ 85721-0041, USA.  
Email: tomat@arizona.edu
- b) Department of Chemistry, University of the Free State, Bloemfontein 9300, Republic of South Africa.
- c) Department of Chemistry, UiT – The Arctic University of Norway, N-9037 Tromsø, Norway.  
Email: abhik.ghosh@uit.no

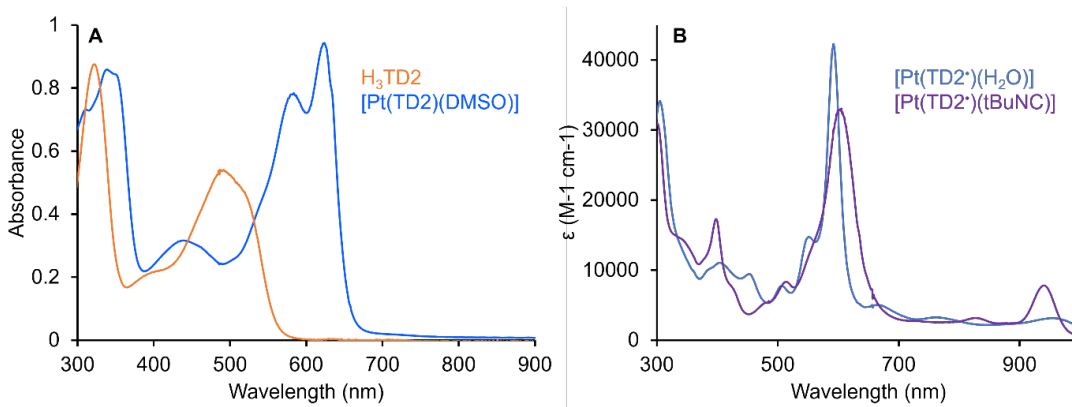

**Figure S1.** Optical absorption spectra of (A)  $H_3TD2$  free ligand and the reaction mixture containing a tentative  $[Pt(TD_2)(DMSO)]$  intermediate in DMSO, and (B) isolated aqua and isocyanide neutral radical complexes in  $CH_2Cl_2$ .

**Table S1. X-ray crystallography details**

| Complex                                   | $[Pt(TD_2^*)(H_2O)]$                    | $[Pt(TD_2^*)(tBuNC)]$                    | $[Pt(TD_{2ox})(H_2O)][BF_4]$         | $[Pt(TD_{2ox})(tBuNC)][BF_4]$        |
|-------------------------------------------|-----------------------------------------|------------------------------------------|--------------------------------------|--------------------------------------|
| Molecular Formula                         | $C_{24}H_{30}N_3O_3Pt$                  | $C_{29}H_{37}N_4O_2Pt$                   | $C_{24}H_{30}BF_4N_3O_3Pt$           | $C_{29}H_{37}BF_4N_4O_2Pt$           |
| Formula weight [ $g \cdot mol^{-1}$ ]     | 603.60                                  | 668.71                                   | 690.41                               | 755.52                               |
| Temperature [K]                           | 101.38                                  | 100.01                                   | 102.25                               | 100.0                                |
| Crystal Class                             | monoclinic                              | monoclinic                               | triclinic                            | monoclinic                           |
| Space Group                               | $P2_1/n$                                | $P2_1/c$                                 | P-1                                  | $P2_1/n$                             |
| a [Å]                                     | 10.982(2)                               | 11.4084(9)                               | 12.453(4)                            | 13.0550(4)                           |
| b [Å]                                     | 14.662(4)                               | 9.6436(6)                                | 15.634(5)                            | 9.2569(3)                            |
| c [Å]                                     | 14.409(3)                               | 25.018(2)                                | 16.230(5)                            | 24.1295(7)                           |
| $\alpha$ [°]                              | 90                                      | 90                                       | 118.240(9)                           | 90                                   |
| $\beta$ [°]                               | 111.249(8)                              | 101.878(4)                               | 110.211(10)                          | 95.9540(10)                          |
| $\gamma$ [°]                              | 90                                      | 90                                       | 92.715(10)                           | 90                                   |
| Volume [Å <sup>3</sup> ]                  | 2162.4(9)                               | 2693.5(3)                                | 2526.0(14)                           | 2900.29(15)                          |
| Z                                         | 4                                       | 4                                        | 4                                    | 4                                    |
| $\rho_{calc}$ [ $g \cdot cm^{-3}$ ]       | 1.854                                   | 1.649                                    | 1.815                                | 1.730                                |
| $\mu$ [ $mm^{-1}$ ]                       | 6.521                                   | 5.242                                    | 5.616                                | 4.898                                |
| F (000)                                   | 1188.0                                  | 1332.0                                   | 1352.0                               | 1496.0                               |
| Crystal Size [mm]                         | 0.367 × 0.123 × 0.085                   | 0.135 × 0.138 × 0.087                    | 0.249 × 0.075 × 0.073                | 0.285 × 0.119 × 0.089                |
| Measure Reflections                       | 25443                                   | 25951                                    | 50027                                | 33463                                |
| Independent Reflections, $I > 2\sigma[I]$ | 4645                                    | 4756                                     | 10465                                | 5947                                 |
| $R_{int}$                                 | 0.0461                                  | 0.0642                                   | 0.0331                               | 0.0270                               |
| Goodness-of-fit on $F^2$                  | 1.024                                   | 1.013                                    | 1.034                                | 1.055                                |
| Final R indexes for $I > 2\sigma[I]$      | $R_1^a = 0.0217$ ,<br>$wR_2^b = 0.0504$ | $R_1^a = 0.0292$ ,<br>$wR_2^b = 0.0599$  | $R_1^a = 0.0303$ , $wR_2^b = 0.0732$ | $R_1^a = 0.0218$ , $wR_2^b = 0.0488$ |
| Final R indexes for all data              | $R_1^a = 0.0280$ ,<br>$wR_2^b = 0.0531$ | $R_1^a = 0.0456$ ,<br>$wR_{2b} = 0.0654$ | $R_1^a = 0.0383$ , $wR_2^b = 0.0767$ | $R_1^a = 0.0242$ , $wR_2^b = 0.0498$ |
| Peak/hole [ $e \cdot \text{Å}^{-3}$ ]     | 1.21/-0.91                              | 0.77/-0.44                               | 3.39/-1.09                           | 1.31/-0.59                           |
| CCDC Number                               | 2182028                                 | 2182030                                  | 2182029                              | 2182027                              |

$$^a R_1 = \Sigma[|F_o| - |F_c|]/\Sigma|F_o|$$

$$^b wR_2 = [\Sigma w(F_o^2 - F_c^2)/\Sigma wF_o^4]^{1/2}$$

**Table S2.** Selected bond lengths for Pt-TD2 complexes; lengths highlighted in blue show the most significant differences between redox states.

|              | [Pt(TD2')(H <sub>2</sub> O)] | [Pt(TD2 <sub>ox</sub> )(H <sub>2</sub> O)] <sup>+</sup> | [Pt(TD2')(tBuNC)] | [Pt(TD2 <sub>ox</sub> )(tBuNC)] <sup>+</sup> |
|--------------|------------------------------|---------------------------------------------------------|-------------------|----------------------------------------------|
| Pt1 – N1     | 1.997(3)                     | 1.992(4)                                                | 2.042(4)          | 1.998(2)                                     |
| Pt1 – N2     | 1.971(3)                     | 1.970(4)                                                | 2.036(4)          | 2.027(2)                                     |
| Pt1 – N3     | 2.004(3)                     | 2.003(4)                                                | 2.039(4)          | 2.006(2)                                     |
| Pt1 – O3/C25 | 2.037(2)                     | 2.045(3)                                                | 1.920(6)          | 1.952(3)                                     |
| N1 – C1      | 1.384(4)                     | 1.450(6)                                                | 1.369(6)          | 1.454(4)                                     |
| N1 – C4      | 1.381(4)                     | 1.336(6)                                                | 1.416(6)          | 1.336(4)                                     |
| N2 – C6      | 1.373(4)                     | 1.378(6)                                                | 1.389(6)          | 1.377(4)                                     |
| N2 – C9      | 1.368(4)                     | 1.371(6)                                                | 1.382(6)          | 1.367(4)                                     |
| N3 – C11     | 1.378(4)                     | 1.336(6)                                                | 1.383(6)          | 1.345(4)                                     |
| N3 – C14     | 1.382(4)                     | 1.437(6)                                                | 1.406(6)          | 1.450(4)                                     |
| O1 – C1      | 1.243(4)                     | 1.206(5)                                                | 1.235(6)          | 1.202(3)                                     |
| O2 – C14     | 1.247(4)                     | 1.210(5)                                                | 1.226(7)          | 1.207(4)                                     |
| C1 – C2      | 1.473(4)                     | 1.478(7)                                                | 1.485(7)          | 1.491(4)                                     |
| C2 – C3      | 1.347(5)                     | 1.333(7)                                                | 1.329(7)          | 1.344(4)                                     |
| C3 – C4      | 1.467(4)                     | 1.485(7)                                                | 1.478(7)          | 1.488(4)                                     |
| C4 – C5      | 1.373(5)                     | 1.395(7)                                                | 1.372(7)          | 1.396(4)                                     |
| C5 – C6      | 1.391(4)                     | 1.367(7)                                                | 1.401(7)          | 1.373(4)                                     |
| C6 – C7      | 1.448(5)                     | 1.458(7)                                                | 1.438(7)          | 1.461(4)                                     |
| C7 – C8      | 1.357(4)                     | 1.352(7)                                                | 1.376(7)          | 1.351(4)                                     |
| C8 – C9      | 1.437(5)                     | 1.468(7)                                                | 1.452(7)          | 1.474(4)                                     |
| C9 – C10     | 1.400(4)                     | 1.376(7)                                                | 1.399(7)          | 1.387(4)                                     |
| C10 – C11    | 1.367(4)                     | 1.387(7)                                                | 1.351(7)          | 1.391(4)                                     |
| C11 – C12    | 1.466(4)                     | 1.488(7)                                                | 1.471(7)          | 1.493(4)                                     |
| C12 – C13    | 1.346(5)                     | 1.332(7)                                                | 1.335(7)          | 1.336(4)                                     |
| C13 – C14    | 1.472(4)                     | 1.481(7)                                                | 1.508(7)          | 1.450(4)                                     |
| N4 – C25     | --                           | --                                                      | 1.170(6)          | 1.155(4)                                     |
| N4 – C26     | --                           | --                                                      | 1.462(7)          | 1.470(4)                                     |

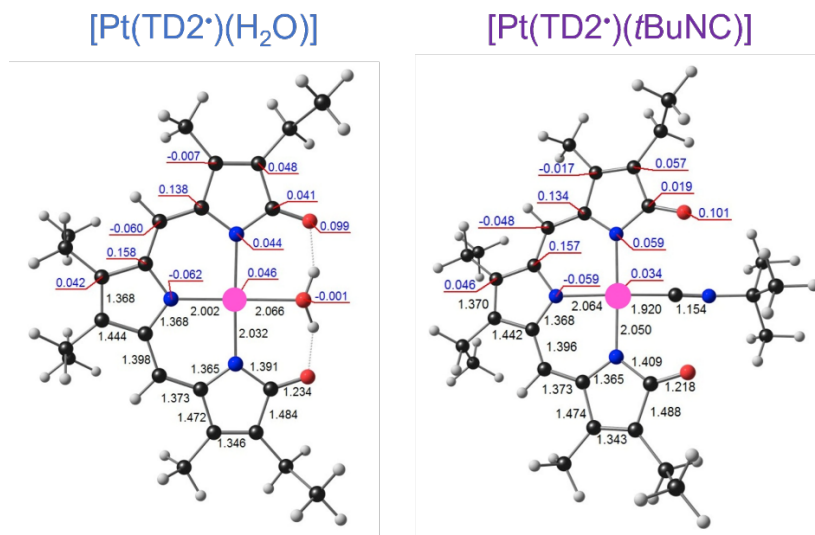

**Figure S2.** B3LYP-D3 optimized geometries and Mulliken spin populations for neutral radical Pt(II) tripyrrindione complexes. Calculated bond distances (Å) and spin populations are indicated in black and blue (with underlining), respectively.

### EPR simulations including dynamic spin exchange

Consider an EPR spectrum of paramagnetic centers in liquid solution, which are participating in a dynamic spin exchange interaction. The shape of the EPR spectrum as a function the angular frequency,  $\omega$ , is in this case described by the following equation (see J. N. Molin, K. M. Salikhov and K. I. i. Zamaraev, *Spin exchange: Principles and applications in chemistry and biology*, Springer, 1980):

$$g(\omega) \propto \text{Im} \left[ \frac{iG}{1 + V_{\text{ex}}G} \right] \quad (\text{S1})$$

where:

$$G = \sum_k \left[ \frac{\varphi_k}{i(\omega_k - \omega) - \frac{1}{T_2} - V_{\text{ex}}} \right] \quad (\text{S2})$$

In these expressions:

- $V_{\text{ex}}$  is the spin exchange coherence transfer rate:  $V_{\text{ex}} = k_{\text{ex}}C$ , where  $k_{\text{ex}}$  is the spin exchange rate constant and  $C$  is the concentration of the paramagnetic center,
- $\varphi_k$  are the statistical weights of EPR lines,
- $\omega_k$  are the EPR resonance frequencies that are expressed through the electronic g-factor, magnetic field, and the hyperfine constants (e.g., for an electron interacting with a single

nucleus of spin  $I = 1/2$ ,  $\omega_k = 2p(g\beta B_o \pm a_{\text{iso}}/2)/h$ , where  $g$  is the electronic g-factor,  $\beta$  is the Bohr magneton,  $B_o$  is the magnetic field,  $a_{\text{iso}}$  is the isotropic hyperfine interaction constant, and  $h$  is the Planck constant).

- $T_2$  is the transverse relaxation time.

Calculations using Eqs. (S1,S2) show that the shape of the room-temperature EPR spectrum of [Pt(TD2')(H<sub>2</sub>O)] can be approximately reproduced for  $^{195}\text{Pt}$   $a_{\text{iso}} < 2$  mT,  $T_2 \sim 10$  ns, and  $V_{\text{ex}} < 10^8$  s<sup>-1</sup>. As an example, the black upper trace in Figure 3 in the main text shows the simulation for  $^{195}\text{Pt}$   $a_{\text{iso}} = 1.4$  mT,  $T_2 = 10.5$  ns, and  $V_{\text{ex}} = 4 \cdot 10^7$  s<sup>-1</sup> (see the detailed parameters in Table S3).

**Table S3. EPR simulation parameters for Figure 3**

| <b>Complex / measurement temperature / phase state</b>                                      | <b>EPR simulation parameters</b>                                                                                                                                                                                                                                                                                                                                                       |
|---------------------------------------------------------------------------------------------|----------------------------------------------------------------------------------------------------------------------------------------------------------------------------------------------------------------------------------------------------------------------------------------------------------------------------------------------------------------------------------------|
| [Pt(TD2')(H <sub>2</sub> O)] / 298 K (room temperature) / liquid (Fig. 2a, top black trace) | $g = 2.004$ ; $a_{\text{iso}}(^{195}\text{Pt}) = 1.4$ mT; $T_2 = 10.5$ ns; Gaussian width, 0.6 mT; $V_{\text{ex}} = 4 \cdot 10^7$ s <sup>-1</sup> (~0.23 mT)                                                                                                                                                                                                                           |
| [Pt(TD2')(tBuNC)] / 298 K (room temperature) / liquid (Fig. 2a, bottom black trace)         | $g = 2.006$ ; $a_{\text{iso}}(^{195}\text{Pt}) = 2.2$ mT; $T_2 = 50$ ns; Gaussian width, 0.6 mT; $V_{\text{ex}} = 0$                                                                                                                                                                                                                                                                   |
| [Pt(TD2')(H <sub>2</sub> O)] / 77 K / frozen glassy solution (Fig. 2b, top black trace)     | $(g_1, g_2, g_3) = (2.026, 2.016, 1.968)$<br>Individual Gaussian linewidths: $(\delta B_1, \delta B_2, \delta B_3) = (1, 0.8, 1.1)$ mT<br>Because of low signal/noise ratio, the $^{195}\text{Pt}$ hfi was not accounted for (effectively included into the individual linewidth)                                                                                                      |
| [Pt(TD2')(tBuNC)] 77 K / frozen glassy solution (Fig. 2b, bottom black trace)               | $(g_1, g_2, g_3) = (2.022, 2.014, 1.978)$<br>$^{195}\text{Pt}$ hfi splittings: $(A_1, A_2, A_3) = (2.15, 1.99, 2.49)$ mT<br>Individual Gaussian linewidths: $(\delta B_1, \delta B_2, \delta B_3) = (0.7, 0.55, 1.1)$ mT for the component without $^{195}\text{Pt}$ hfi and $(\delta B_1, \delta B_2, \delta B_3) = (0.9, 0.55, 1.1)$ mT for the component with $^{195}\text{Pt}$ hfi |

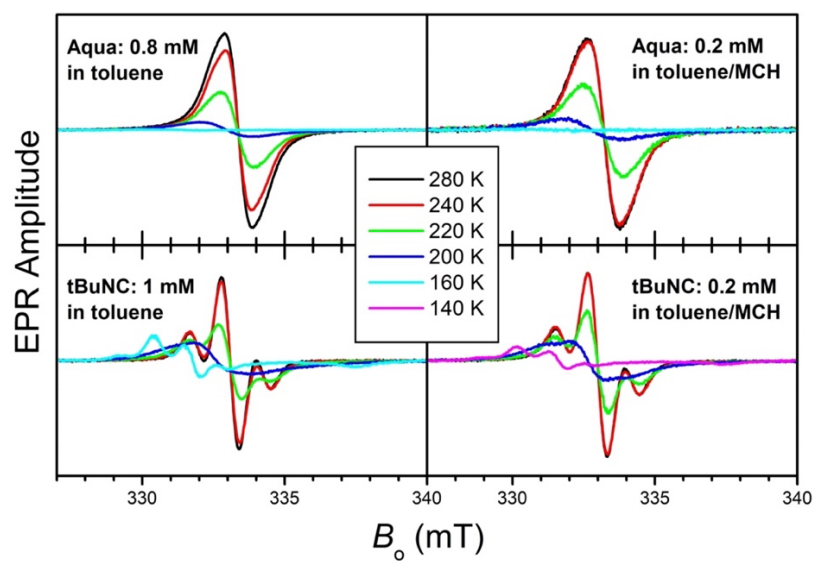

**Figure S3.** Variable-temperature EPR spectra of  $[\text{Pt}(\text{TD2}')(\text{H}_2\text{O})]$  and  $[\text{Pt}(\text{TD2}')(\text{tBuNC})]$  in toluene or in toluene/methylcyclohexane (1:3 v/v).

**Table S4.** Half-wave potentials of divalent metal complexes of tripyrrin-1,14-dione in  $\text{CH}_2\text{Cl}_2$

| Complex                                        | $E_{1/2}$ ox. (V vs Fc/Fc <sup>+</sup> ) | $E_{1/2}$ red. (V vs Fc/Fc <sup>+</sup> ) |
|------------------------------------------------|------------------------------------------|-------------------------------------------|
| $[\text{Pd}(\text{TD1}')(\text{H}_2\text{O})]$ | -0.052                                   | -0.672                                    |
| $[\text{Cu}(\text{TD1}')(\text{H}_2\text{O})]$ | -0.052                                   | -0.688                                    |
| $[\text{Pt}(\text{TD2}')(\text{H}_2\text{O})]$ | -0.107                                   | -0.701                                    |
| $[\text{Pt}(\text{TD2}')(\text{tBuNC})]$       | -0.338                                   | -0.866                                    |

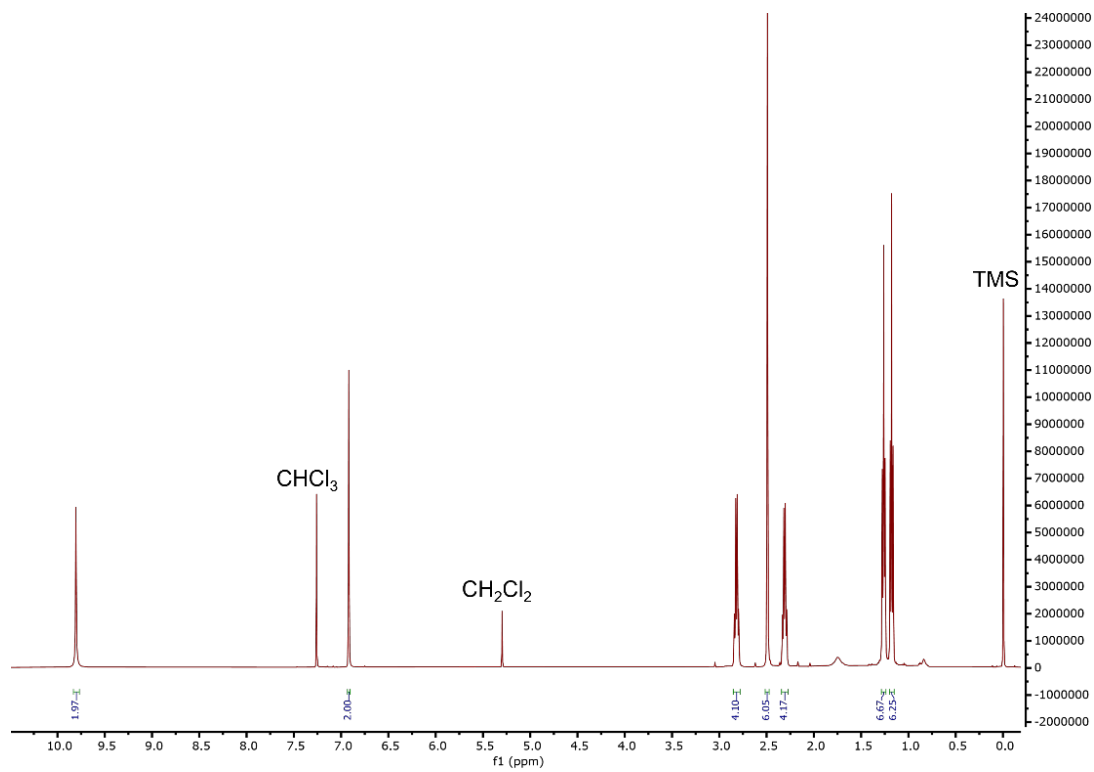

**Figure S4.**  $^1\text{H}$  NMR spectrum of  $[\text{Pt}(\text{TD}_{2\text{ox}})(\text{H}_2\text{O})][\text{BF}_4]$  in  $\text{CDCl}_3$  at 298 K.

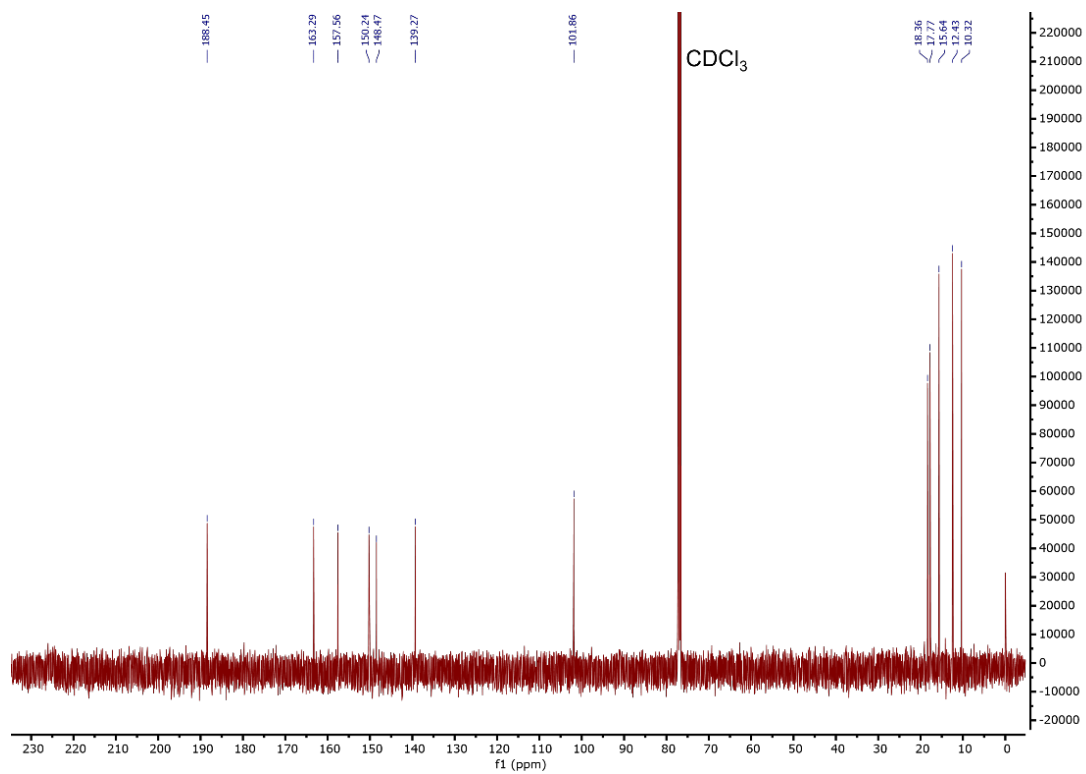

**Figure S5.**  $^{13}\text{C}$  NMR spectrum of  $[\text{Pt}(\text{TD}_{2\text{ox}})(\text{H}_2\text{O})][\text{BF}_4]$  in  $\text{CDCl}_3$  at 298 K.

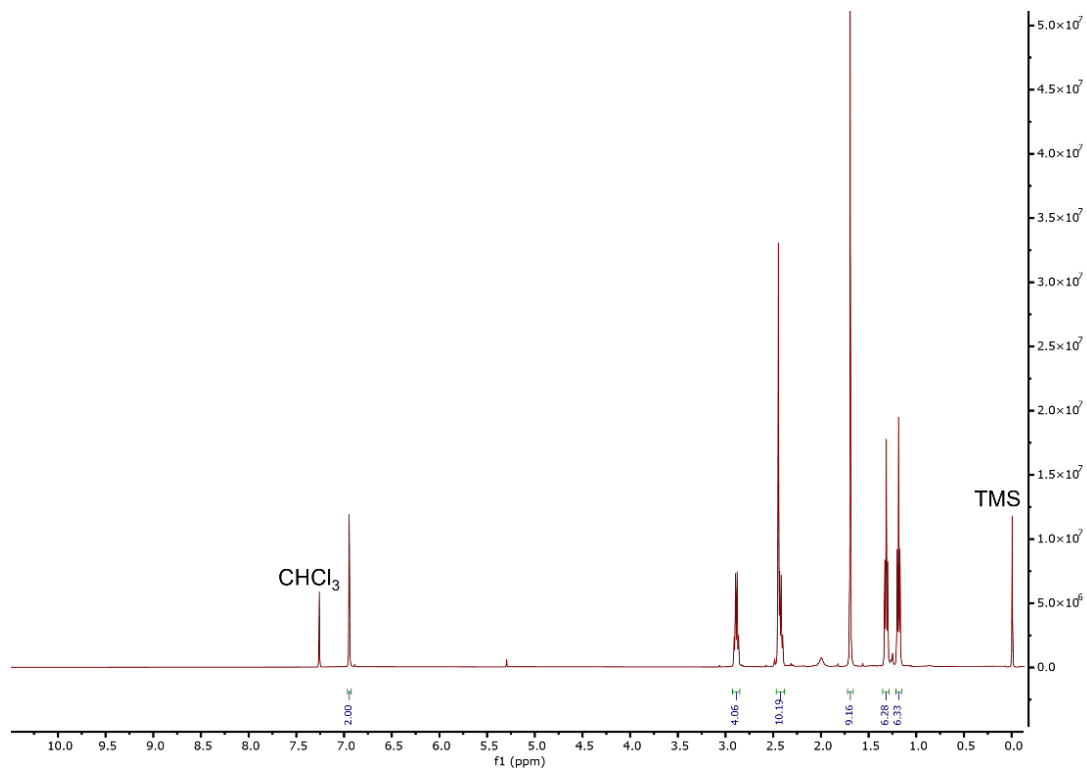

Figure S6.  $^1\text{H}$  NMR spectrum of  $[\text{Pt}(\text{TD}_{2\text{ox}})(t\text{BuNC})][\text{BF}_4]$  in  $\text{CDCl}_3$  at 298 K.

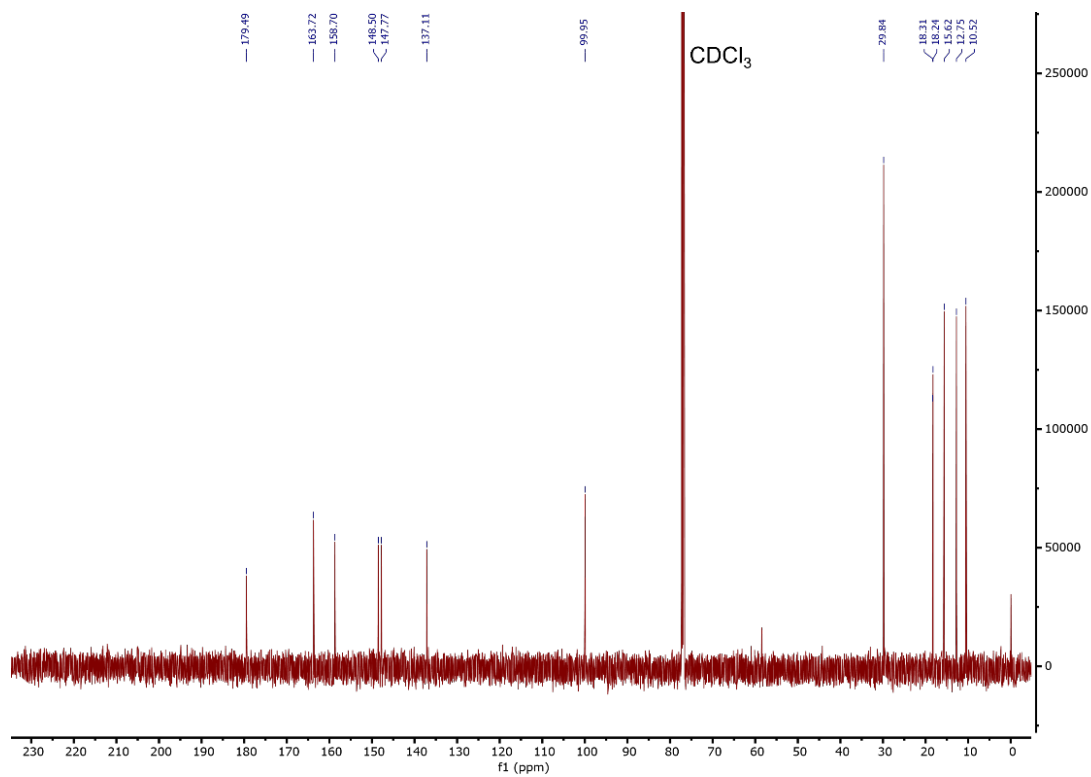

Figure S7.  $^{13}\text{C}$  NMR spectrum of  $[\text{Pt}(\text{TD}_{2\text{ox}})(t\text{BuNC})][\text{BF}_4]$  in  $\text{CDCl}_3$  at 298 K.



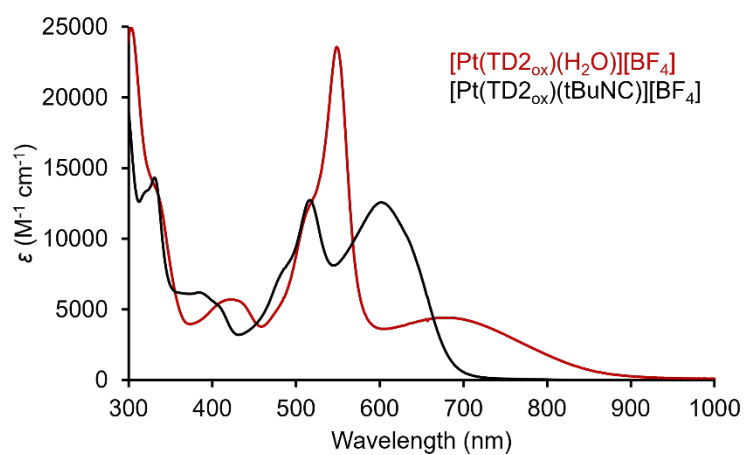

**Figure S8.** UV-visible absorption spectra of  $[\text{Pt}(\text{TD}_{2\text{ox}})(\text{H}_2\text{O})][\text{BF}_4]$  (red) and  $[\text{Pt}(\text{TD}_{2\text{ox}})(\text{tBuNC})][\text{BF}_4]$  (black) in  $\text{CH}_2\text{Cl}_2$ .

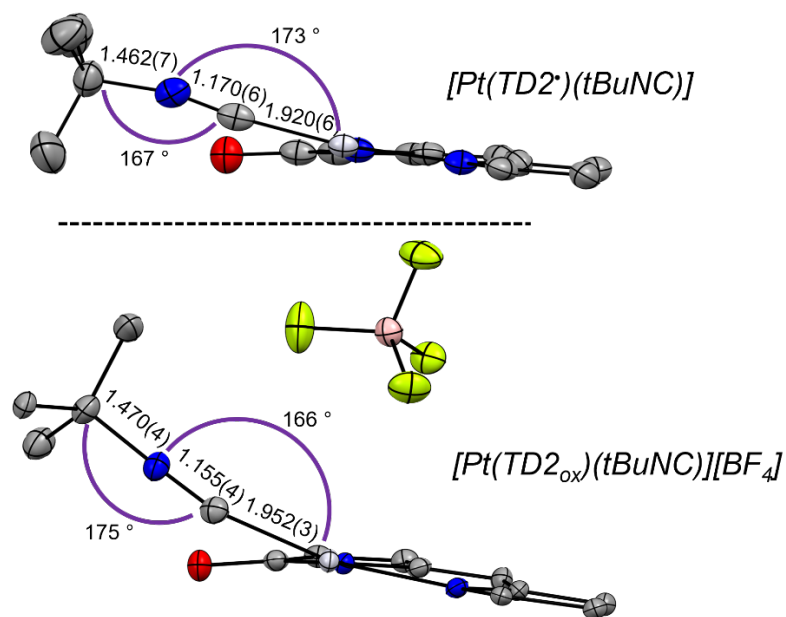

**Figure S9.** Comparison of isocyanide bond lengths and angles between the neutral and cationic Pt(II) tripyrrindione complexes.

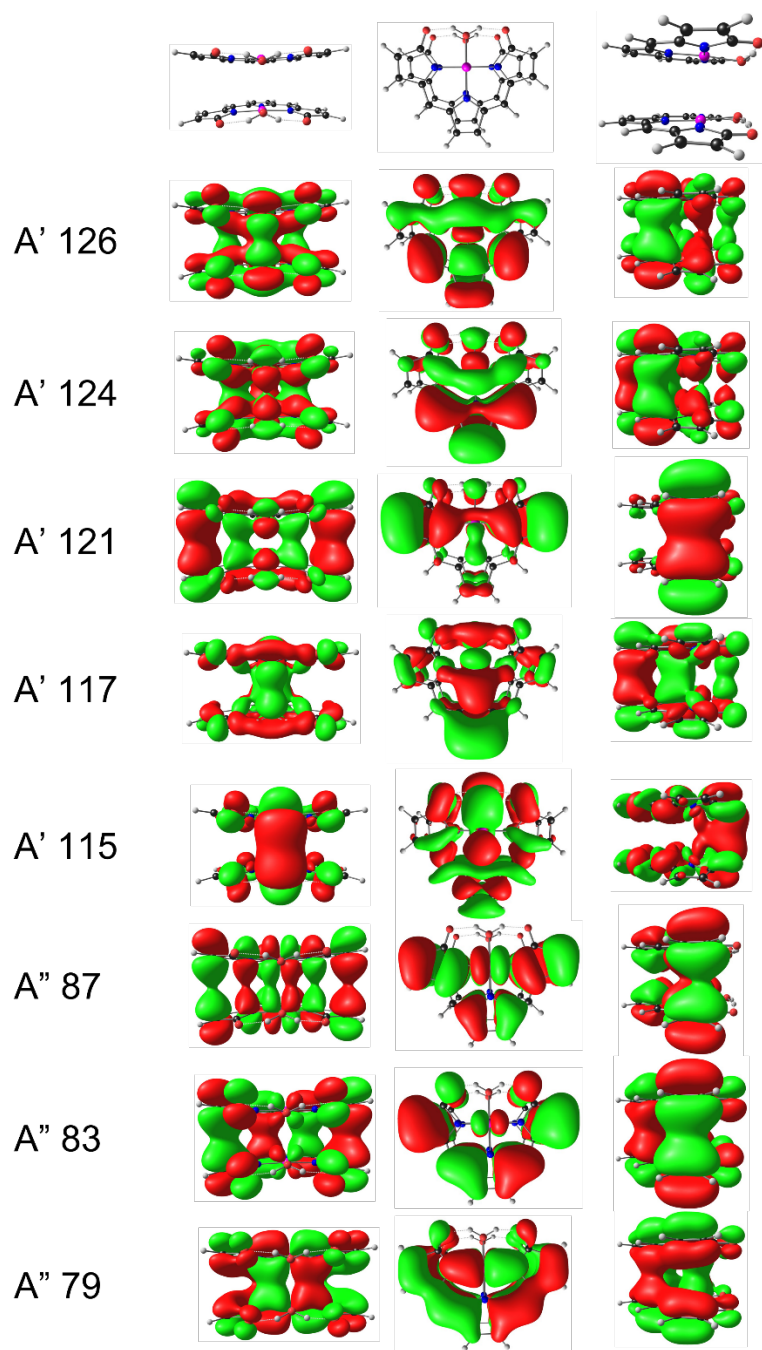

**Figure S10.** B3LYP-D3 calculated valence MOs of  $[\text{Pt}(\text{TD2}'_{\text{ox}})(\text{H}_2\text{O})_2]^{2+}$  ( $C_s$ ).

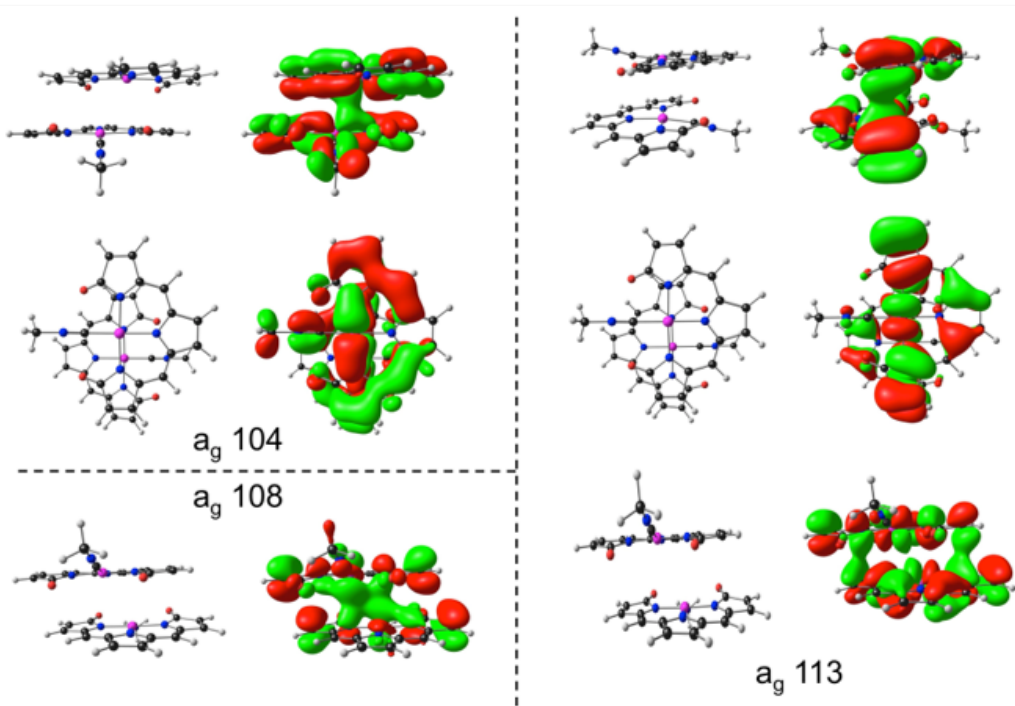

**Figure S11.** B3LYP-D3 calculated valence MOs of  $[\text{Pt}(\text{TD2}'_{\text{ox}})(\text{MeNC})]_2^{2+}$  ( $C_i$ ).

## Optimized Cartesian coordinates (Å)

All compounds were optimized the ZORA Hamiltonian, ZORA/QZ4P basis set, all electron, OLYP functional.

|                                                                                                             |                                     |
|-------------------------------------------------------------------------------------------------------------|-------------------------------------|
| Table of Contents .....                                                                                     | <b>Error! Bookmark not defined.</b> |
| 1. [Pt(TD2)(CN <sup>t</sup> Bu)], C <sub>s</sub> , q = 0, S = 1/2 .....                                     | 13                                  |
| 2. [Pt(TD2)(OH <sub>2</sub> )], C <sub>s</sub> , q = 0, S = 1/2 .....                                       | 15                                  |
| 3. [Pt(TD2)(CN <sup>t</sup> Bu)] <sub>2</sub> simplified, C <sub>1</sub> , q = 0 (BS), S = 0.....           | 18                                  |
| 4. [Pt(TD2)(OH <sub>2</sub> )] <sub>2</sub> simplified, C <sub>1</sub> , q = 0 (BS), S = 0.....             | 20                                  |
| 5. [Pt(TD2)(CN <sup>t</sup> Bu)] <sub>2</sub> <sup>2+</sup> simplified, C <sub>1</sub> , q = 2, S = 0 ..... | 22                                  |
| 6. [Pt(TD2)(OH <sub>2</sub> )] <sub>2</sub> <sup>2+</sup> simplified, C <sub>s</sub> , q = 2, S = 0 .....   | 25                                  |

1. [Pt(TD2)(CN<sup>t</sup>Bu)], C<sub>s</sub>, q = 0, S = 1/2

|    |              |              |              |
|----|--------------|--------------|--------------|
| Pt | -0.046144000 | 0.022106000  | 0.000000000  |
| C  | 0.042309000  | -0.706700000 | 4.262931000  |
| C  | 0.042309000  | -0.706700000 | -4.262931000 |
| C  | 0.198939000  | 0.626415000  | 4.303295000  |
| C  | 0.198939000  | 0.626415000  | -4.303295000 |
| C  | 0.236113000  | 1.114875000  | 2.898423000  |
| C  | 0.236113000  | 1.114875000  | -2.898423000 |
| C  | 0.386588000  | 1.557363000  | 5.450210000  |
| C  | 0.386588000  | 1.557363000  | -5.450210000 |
| C  | 0.658112000  | 4.961101000  | 0.000000000  |
| C  | 1.866212000  | 1.901105000  | 5.681354000  |
| C  | 1.866212000  | 1.901105000  | -5.681354000 |
| C  | -0.027993000 | -1.097785000 | 2.843783000  |
| C  | -0.027993000 | -1.097785000 | -2.843783000 |
| C  | -0.031076000 | -1.675413000 | 5.394280000  |
| C  | -0.031076000 | -1.675413000 | -5.394280000 |
| C  | -0.092167000 | -2.851456000 | 1.100060000  |
| C  | -0.092167000 | -2.851456000 | -1.100060000 |
| C  | -0.100700000 | -2.401855000 | 2.421482000  |
| C  | -0.100700000 | -2.401855000 | -2.421482000 |
| C  | -0.182773000 | -4.229225000 | 0.684902000  |
| C  | -0.182773000 | -4.229225000 | -0.684902000 |
| C  | -0.314321000 | -5.397221000 | 1.609382000  |
| C  | -0.314321000 | -5.397221000 | -1.609382000 |
| C  | -0.368137000 | 1.914520000  | 0.000000000  |
| C  | -0.789119000 | 4.448069000  | 0.000000000  |
| C  | -1.529461000 | 4.887399000  | 1.268028000  |

|   |              |              |              |
|---|--------------|--------------|--------------|
| C | -1.529461000 | 4.887399000  | -1.268028000 |
| C | -1.750586000 | -5.604011000 | 2.114830000  |
| C | -1.750586000 | -5.604011000 | -2.114830000 |
| H | 0.007637000  | -1.162236000 | 6.353078000  |
| H | 0.007637000  | -1.162236000 | -6.353078000 |
| H | 0.019429000  | -6.302291000 | 1.099219000  |
| H | 0.019429000  | -6.302291000 | -1.099219000 |
| H | 0.354333000  | -5.269853000 | 2.464268000  |
| H | 0.354333000  | -5.269853000 | -2.464268000 |
| H | 0.655548000  | 6.051375000  | 0.000000000  |
| H | 0.799222000  | -2.384742000 | 5.361246000  |
| H | 0.799222000  | -2.384742000 | -5.361246000 |
| H | 1.180294000  | 4.603981000  | 0.886159000  |
| H | 1.180294000  | 4.603981000  | -0.886159000 |
| H | 1.976136000  | 2.606531000  | 6.506232000  |
| H | 1.976136000  | 2.606531000  | -6.506232000 |
| H | 2.293401000  | 2.350975000  | 4.785662000  |
| H | 2.293401000  | 2.350975000  | -4.785662000 |
| H | 2.439298000  | 1.003641000  | 5.918869000  |
| H | 2.439298000  | 1.003641000  | -5.918869000 |
| H | -0.039941000 | 1.125365000  | 6.357373000  |
| H | -0.039941000 | 1.125365000  | -6.357373000 |
| H | -0.155199000 | -3.159862000 | 3.188372000  |
| H | -0.155199000 | -3.159862000 | -3.188372000 |
| H | -0.160960000 | 2.478828000  | 5.241351000  |
| H | -0.160960000 | 2.478828000  | -5.241351000 |
| H | -0.954969000 | -2.257057000 | 5.358671000  |
| H | -0.954969000 | -2.257057000 | -5.358671000 |
| H | -1.013794000 | 4.513976000  | 2.151095000  |

|   |              |              |              |
|---|--------------|--------------|--------------|
| H | -1.013794000 | 4.513976000  | -2.151095000 |
| H | -1.567068000 | 5.976133000  | 1.305516000  |
| H | -1.567068000 | 5.976133000  | -1.305516000 |
| H | -1.805998000 | -6.453865000 | 2.796879000  |
| H | -1.805998000 | -6.453865000 | -2.796879000 |
| H | -2.110298000 | -4.718892000 | 2.640252000  |
| H | -2.110298000 | -4.718892000 | -2.640252000 |
| H | -2.428508000 | -5.790035000 | 1.281300000  |
| H | -2.428508000 | -5.790035000 | -1.281300000 |
| H | -2.549922000 | 4.504323000  | 1.269457000  |
| H | -2.549922000 | 4.504323000  | -1.269457000 |
| N | 0.045747000  | 0.007887000  | 2.047452000  |
| N | 0.045747000  | 0.007887000  | -2.047452000 |
| N | -0.021144000 | -2.042197000 | 0.000000000  |
| N | -0.723671000 | 3.011908000  | 0.000000000  |
| O | 0.419218000  | 2.269655000  | 2.557156000  |
| O | 0.419218000  | 2.269655000  | -2.557156000 |

2. [Pt(TD2)(OH<sub>2</sub>)] , C<sub>s</sub> , q = 0 , S = 1/2

|   |             |              |              |
|---|-------------|--------------|--------------|
| C | 0.708530000 | -4.285060000 | -0.173191000 |
| C | 1.119259000 | -2.906669000 | -0.043217000 |
| C | 1.641123000 | -5.443179000 | -0.333085000 |
| C | 2.160181000 | -5.600856000 | -1.771106000 |
| C | 2.441438000 | -2.453817000 | -0.001354000 |
| C | 2.829236000 | 1.066362000  | 0.189001000  |
| C | 2.854269000 | -1.149070000 | 0.103507000  |
| C | 4.247218000 | 0.642994000  | 0.075308000  |

|   |              |              |              |
|---|--------------|--------------|--------------|
| C | 4.255110000  | -0.702273000 | 0.032224000  |
| C | 5.358327000  | 1.633766000  | 0.048070000  |
| C | 5.414362000  | -1.632282000 | -0.083628000 |
| C | 5.669579000  | 2.199372000  | 1.442473000  |
| C | -0.659629000 | -4.293519000 | -0.173005000 |
| C | -1.087234000 | -2.919979000 | -0.045091000 |
| C | -1.578359000 | -5.462843000 | -0.331555000 |
| C | -2.096465000 | -5.627717000 | -1.769116000 |
| C | -2.414831000 | -2.482707000 | -0.005576000 |
| C | -2.843205000 | -1.183085000 | 0.100407000  |
| C | -2.845566000 | 1.032131000  | 0.195233000  |
| C | -4.249377000 | -0.753166000 | 0.029478000  |
| C | -4.258017000 | 0.591895000  | 0.078378000  |
| C | -5.380739000 | 1.569611000  | 0.053128000  |
| C | -5.397140000 | -1.696676000 | -0.091254000 |
| C | -5.696447000 | 2.132248000  | 1.447663000  |
| H | 0.831834000  | 2.288646000  | 0.508339000  |
| H | 1.133176000  | -6.360927000 | -0.033116000 |
| H | 1.333493000  | -5.770809000 | -2.461419000 |
| H | 2.488922000  | -5.332599000 | 0.347360000  |
| H | 2.682893000  | -4.701736000 | -2.098551000 |
| H | 2.848149000  | -6.444157000 | -1.846660000 |
| H | 3.211577000  | -3.205730000 | -0.087618000 |
| H | 4.785888000  | 2.678027000  | 1.863207000  |
| H | 5.071597000  | 2.456616000  | -0.610305000 |
| H | 5.342628000  | -2.242589000 | -0.986952000 |
| H | 5.454618000  | -2.316826000 | 0.766730000  |
| H | 5.984099000  | 1.405216000  | 2.121031000  |
| H | 6.254164000  | 1.177726000  | -0.376528000 |



|    |              |              |              |
|----|--------------|--------------|--------------|
| H  | 6.355280000  | -1.087357000 | -0.119506000 |
| H  | 6.467744000  | 2.940771000  | 1.388484000  |
| H  | -0.861364000 | 2.278718000  | 0.510239000  |
| H  | -1.059389000 | -6.374286000 | -0.031210000 |
| H  | -1.268264000 | -5.788223000 | -2.459888000 |
| H  | -2.426996000 | -5.361761000 | 0.349325000  |
| H  | -2.630092000 | -4.735130000 | -2.096829000 |
| H  | -2.774375000 | -6.479216000 | -1.843637000 |
| H  | -3.175903000 | -3.243580000 | -0.093780000 |
| H  | -4.817229000 | 2.619959000  | 1.867332000  |
| H  | -5.104290000 | 2.395694000  | -0.605697000 |
| H  | -5.316103000 | -2.303614000 | -0.996052000 |
| H  | -5.431188000 | -2.383969000 | 0.757175000  |
| H  | -6.002344000 | 1.335187000  | 2.126741000  |
| H  | -6.271836000 | 1.103362000  | -0.370319000 |
| H  | -6.344404000 | -1.162895000 | -0.127809000 |
| H  | -6.502027000 | 2.865612000  | 1.394118000  |
| N  | 0.011058000  | -2.108115000 | 0.022793000  |
| N  | 2.028427000  | -0.069937000 | 0.231788000  |
| N  | -2.030607000 | -0.094264000 | 0.232138000  |
| O  | 2.436400000  | 2.235729000  | 0.217539000  |
| O  | -0.011938000 | 1.873514000  | 0.826944000  |
| O  | -2.467488000 | 2.206290000  | 0.231103000  |
| Pt | -0.000829000 | -0.126957000 | 0.310100000  |

3. [Pt(TD2)(CN<sup>t</sup>Bu)]<sub>2</sub> simplified, C<sub>1</sub>, q = 0 (BS), S = 0

|   |             |             |              |
|---|-------------|-------------|--------------|
| C | 0.090800000 | 5.605700000 | 13.221500000 |
| C | 0.337100000 | 2.359500000 | 7.902300000  |
| C | 0.704500000 | 5.522300000 | 14.447500000 |
| C | 1.139300000 | 8.956800000 | 12.122400000 |
| C | 1.229700000 | 2.984400000 | 10.201000000 |
| C | 1.314100000 | 9.092000000 | 13.440600000 |
| C | 1.806300000 | 4.733100000 | 14.759600000 |
| C | 2.066500000 | 7.454900000 | 10.362800000 |
| C | 2.075800000 | 7.944500000 | 11.646200000 |
| C | 2.393600000 | 8.164500000 | 13.851100000 |
| C | 2.479100000 | 4.703000000 | 16.025200000 |
| C | 2.801200000 | 5.878400000 | 8.547900000  |
| C | 2.865700000 | 6.426900000 | 9.871400000  |
| C | 3.390900000 | 3.212700000 | 14.611700000 |
| C | 3.457800000 | 3.763600000 | 15.934000000 |
| C | 3.780300000 | 4.939400000 | 8.456900000  |
| C | 3.862200000 | 1.473500000 | 10.632800000 |
| C | 4.178400000 | 1.692900000 | 12.838000000 |
| C | 4.188000000 | 2.182700000 | 14.121400000 |
| C | 4.450900000 | 4.907000000 | 9.724100000  |
| C | 4.939800000 | 0.543900000 | 11.044400000 |
| C | 5.029800000 | 6.662100000 | 14.279800000 |
| C | 5.114500000 | 0.679700000 | 12.362900000 |
| C | 5.551400000 | 4.116200000 | 10.038100000 |
| C | 5.941600000 | 7.309800000 | 16.565300000 |
| C | 6.164000000 | 4.032600000 | 11.264700000 |
| C | 6.590200000 | 4.162800000 | 13.458000000 |

|   |              |              |              |
|---|--------------|--------------|--------------|
| C | 7.253700000  | 3.106900000  | 11.551100000 |
| C | 7.513100000  | 3.170100000  | 12.861500000 |
| C | -0.335300000 | 5.479000000  | 11.028400000 |
| C | -1.000000000 | 6.530300000  | 12.937200000 |
| C | -1.259400000 | 6.469500000  | 11.626800000 |
| H | 0.329700000  | 6.165900000  | 15.230200000 |
| H | 0.423500000  | 9.447400000  | 11.482400000 |
| H | 0.795400000  | 9.724400000  | 14.141500000 |
| H | 1.201600000  | 2.068000000  | 7.305900000  |
| H | 1.339400000  | 7.873300000  | 9.681800000  |
| H | 2.081800000  | 6.174300000  | 7.803200000  |
| H | 2.230400000  | 5.336700000  | 16.859700000 |
| H | 4.030100000  | 4.306800000  | 7.622000000  |
| H | 4.177700000  | 3.468000000  | 16.678400000 |
| H | 4.914500000  | 1.763700000  | 14.802600000 |
| H | 5.084500000  | 7.613500000  | 17.166400000 |
| H | 5.457600000  | -0.089500000 | 10.343800000 |
| H | 5.829600000  | 0.188900000  | 13.003400000 |
| H | 5.926300000  | 3.471900000  | 9.256000000  |
| H | 6.378400000  | 6.395900000  | 16.968300000 |
| H | 6.688100000  | 8.102500000  | 16.575100000 |
| H | 7.703300000  | 2.474100000  | 10.802800000 |
| H | 8.231500000  | 2.621400000  | 13.447100000 |
| H | -0.100400000 | 3.276700000  | 7.507900000  |
| H | -0.405100000 | 1.563100000  | 7.874600000  |
| H | -1.450000000 | 7.161300000  | 13.686800000 |
| H | -1.978600000 | 7.018300000  | 11.042300000 |
| N | 0.442900000  | 4.943800000  | 12.081900000 |
| N | 0.752400000  | 2.590400000  | 9.228300000  |

|    |              |             |              |
|----|--------------|-------------|--------------|
| N  | 2.398900000  | 3.839400000 | 13.909400000 |
| N  | 2.855400000  | 7.517400000 | 12.679800000 |
| N  | 3.399600000  | 2.120600000 | 11.803900000 |
| N  | 3.857500000  | 5.800200000 | 10.574100000 |
| N  | 5.512700000  | 7.063500000 | 15.246500000 |
| N  | 5.812600000  | 4.696300000 | 12.403300000 |
| O  | 2.792200000  | 7.968700000 | 14.984400000 |
| O  | 3.465100000  | 1.669700000 | 9.499100000  |
| O  | 6.492500000  | 4.446700000 | 14.638100000 |
| O  | -0.237700000 | 5.198000000 | 9.847600000  |
| Pt | 1.873000000  | 3.481600000 | 11.939400000 |
| Pt | 4.383300000  | 6.158900000 | 12.544400000 |

**4. [Pt(TD2)(OH<sub>2</sub>)]<sub>2</sub> simplified, C<sub>1</sub>, q = 0 (BS), S = 0**

|   |             |             |              |
|---|-------------|-------------|--------------|
| C | 0.411200000 | 5.502500000 | 14.080000000 |
| C | 1.360600000 | 8.971500000 | 12.605900000 |
| C | 1.473600000 | 4.678800000 | 14.455000000 |
| C | 1.748700000 | 9.210600000 | 13.865600000 |
| C | 2.067600000 | 4.624800000 | 15.761000000 |
| C | 2.127900000 | 7.412600000 | 10.795400000 |
| C | 2.205100000 | 7.907300000 | 12.073400000 |
| C | 2.817200000 | 5.871200000 | 8.927700000  |
| C | 2.862700000 | 8.288500000 | 14.165900000 |
| C | 2.950200000 | 6.429600000 | 10.244700000 |
| C | 3.069500000 | 3.712100000 | 15.708400000 |
| C | 3.102300000 | 3.192300000 | 14.370300000 |
| C | 3.654900000 | 1.434600000 | 10.443000000 |

|   |              |              |              |
|---|--------------|--------------|--------------|
| C | 3.789400000  | 4.933700000  | 8.789300000  |
| C | 3.985700000  | 2.221500000  | 13.897000000 |
| C | 4.025800000  | 1.720000000  | 12.619200000 |
| C | 4.532600000  | 4.908300000  | 10.018200000 |
| C | 4.789200000  | 0.571500000  | 10.825500000 |
| C | 5.006800000  | 0.753600000  | 12.135000000 |
| C | 5.620000000  | 4.078200000  | 10.291100000 |
| C | 6.316800000  | 4.023900000  | 11.472100000 |
| C | 7.020000000  | 4.444000000  | 13.542500000 |
| C | 7.497700000  | 3.198000000  | 11.704800000 |
| C | 7.932400000  | 3.446000000  | 12.947600000 |
| C | -0.143900000 | 5.583500000  | 12.827100000 |
| C | -0.473800000 | 5.339900000  | 10.639500000 |
| C | -1.181900000 | 6.531900000  | 12.437700000 |
| C | -1.388100000 | 6.394500000  | 11.120700000 |
| H | 0.013700000  | 6.159300000  | 14.841000000 |
| H | 0.579900000  | 9.452500000  | 12.038700000 |
| H | 0.634000000  | 3.656800000  | 9.394100000  |
| H | 1.351600000  | 7.809100000  | 10.156400000 |
| H | 1.377000000  | 9.929800000  | 14.575700000 |
| H | 1.763600000  | 5.234800000  | 16.595000000 |
| H | 1.846400000  | 2.487800000  | 9.340700000  |
| H | 2.050100000  | 6.149200000  | 8.225100000  |
| H | 3.751900000  | 3.424500000  | 16.490300000 |
| H | 3.985500000  | 4.291100000  | 7.947700000  |
| H | 4.580700000  | 7.028500000  | 15.186900000 |
| H | 4.717600000  | 1.847300000  | 14.599100000 |
| H | 5.310700000  | -0.055800000 | 10.122300000 |
| H | 5.764500000  | 0.308200000  | 12.759600000 |

|    |              |             |              |
|----|--------------|-------------|--------------|
| H  | 5.846300000  | 5.899000000 | 14.990700000 |
| H  | 5.937400000  | 3.418200000 | 9.496300000  |
| H  | 7.911800000  | 2.529200000 | 10.967200000 |
| H  | 8.781900000  | 3.043300000 | 13.472700000 |
| H  | -1.654700000 | 7.214400000 | 13.125900000 |
| H  | -2.066300000 | 6.922500000 | 10.471900000 |
| N  | 0.233800000  | 4.850800000 | 11.739000000 |
| N  | 2.126200000  | 3.802800000 | 13.631100000 |
| N  | 3.084300000  | 7.500000000 | 13.035300000 |
| N  | 3.201000000  | 2.082700000 | 11.593900000 |
| N  | 4.000500000  | 5.827100000 | 10.881400000 |
| N  | 6.035800000  | 4.742800000 | 12.597800000 |
| O  | 1.067700000  | 2.873200000 | 9.820200000  |
| O  | 3.210300000  | 1.588000000 | 9.302200000  |
| O  | 3.491100000  | 8.230600000 | 15.226600000 |
| O  | 4.904300000  | 6.162800000 | 14.823100000 |
| O  | 7.115000000  | 4.932100000 | 14.671500000 |
| O  | -0.331400000 | 4.980900000 | 9.467400000  |
| Pt | 1.680100000  | 3.423800000 | 11.716600000 |
| Pt | 4.508800000  | 6.067700000 | 12.803200000 |

5. **[Pt(TD2)(CN<sup>t</sup>Bu)]<sub>2</sub><sup>2+</sup> simplified, C<sub>i</sub>, q = 2, S = 0**

|   |             |              |              |
|---|-------------|--------------|--------------|
| C | 0.524863000 | -2.764069000 | -4.653003000 |
| C | 0.583630000 | -1.515427000 | -3.852114000 |
| C | 0.871510000 | -3.766661000 | -3.851871000 |
| C | 1.195356000 | -3.206558000 | -2.522209000 |
| C | 1.485454000 | -3.999709000 | -1.418705000 |

|   |              |              |              |
|---|--------------|--------------|--------------|
| C | 1.618069000  | 0.903536000  | -2.268943000 |
| C | 1.700577000  | -3.526039000 | -0.142202000 |
| C | 1.764322000  | 2.083753000  | 0.570175000  |
| C | 1.966757000  | -4.360101000 | 1.022060000  |
| C | 2.003806000  | 2.814912000  | -3.934460000 |
| C | 2.051641000  | -2.173067000 | 1.553759000  |
| C | 2.177600000  | -3.533267000 | 2.059032000  |
| C | 2.185496000  | 2.537896000  | 1.919329000  |
| C | 2.194172000  | 0.265363000  | 1.799949000  |
| C | 2.275729000  | -1.032859000 | 2.291655000  |
| C | 2.426012000  | 1.453645000  | 2.648261000  |
| C | -0.524863000 | 2.764069000  | 4.653003000  |
| C | -0.583630000 | 1.515427000  | 3.852114000  |
| C | -0.871510000 | 3.766661000  | 3.851871000  |
| C | -1.195356000 | 3.206558000  | 2.522209000  |
| C | -1.485454000 | 3.999709000  | 1.418705000  |
| C | -1.618069000 | -0.903536000 | 2.268943000  |
| C | -1.700577000 | 3.526039000  | 0.142202000  |
| C | -1.764322000 | -2.083753000 | -0.570175000 |
| C | -1.966757000 | 4.360101000  | -1.022060000 |
| C | -2.003806000 | -2.814912000 | 3.934460000  |
| C | -2.051641000 | 2.173067000  | -1.553759000 |
| C | -2.177600000 | 3.533267000  | -2.059032000 |
| C | -2.185496000 | -2.537896000 | -1.919329000 |
| C | -2.194172000 | -0.265363000 | -1.799949000 |
| C | -2.275729000 | 1.032859000  | -2.291655000 |
| C | -2.426012000 | -1.453645000 | -2.648261000 |
| H | 0.214888000  | -2.780196000 | -5.684554000 |
| H | 0.916716000  | -4.821242000 | -4.074561000 |

|   |              |              |              |
|---|--------------|--------------|--------------|
| H | 1.331167000  | 2.678103000  | -4.779647000 |
| H | 1.515372000  | -5.069302000 | -1.567708000 |
| H | 1.780424000  | 3.748922000  | -3.421229000 |
| H | 1.995738000  | -5.437292000 | 1.004956000  |
| H | 2.243809000  | 3.578685000  | 2.189303000  |
| H | 2.422610000  | -3.784403000 | 3.078089000  |
| H | 2.529941000  | -1.151737000 | 3.334508000  |
| H | 2.727189000  | 1.386410000  | 3.681459000  |
| H | 3.033479000  | 2.827920000  | -4.286974000 |
| H | -0.214888000 | 2.780196000  | 5.684554000  |
| H | -0.916716000 | 4.821242000  | 4.074561000  |
| H | -1.331167000 | -2.678103000 | 4.779647000  |
| H | -1.515372000 | 5.069302000  | 1.567708000  |
| H | -1.780424000 | -3.748922000 | 3.421229000  |
| H | -1.995738000 | 5.437292000  | -1.004956000 |
| H | -2.243809000 | -3.578685000 | -2.189303000 |
| H | -2.422610000 | 3.784403000  | -3.078089000 |
| H | -2.529941000 | 1.151737000  | -3.334508000 |
| H | -2.727189000 | -1.386410000 | -3.681459000 |
| H | -3.033479000 | -2.827920000 | 4.286974000  |
| N | 1.092898000  | -1.872573000 | -2.538516000 |
| N | 1.733950000  | -2.211078000 | 0.225168000  |
| N | 1.829958000  | 1.740170000  | -3.026822000 |
| N | 1.871585000  | 0.632944000  | 0.556172000  |
| N | -1.092898000 | 1.872573000  | 2.538516000  |
| N | -1.733950000 | 2.211078000  | -0.225168000 |
| N | -1.829958000 | -1.740170000 | 3.026822000  |
| N | -1.871585000 | -0.632944000 | -0.556172000 |
| O | 0.211440000  | -0.416068000 | -4.157480000 |



|    |              |              |              |
|----|--------------|--------------|--------------|
| O  | 1.351547000  | 2.747912000  | -0.338219000 |
| O  | -0.211440000 | 0.416068000  | 4.157480000  |
| O  | -1.351547000 | -2.747912000 | 0.338219000  |
| Pt | 1.528127000  | -0.589537000 | -1.026431000 |
| Pt | -1.528127000 | 0.589537000  | 1.026431000  |

6.  $[\text{Pt}(\text{TD2})(\text{OH}_2)]_2^{2+}$  simplified,  $C_s$ ,  $q = 2$ ,  $S = 0$

|   |              |              |              |
|---|--------------|--------------|--------------|
| C | 1.635755000  | -3.970799000 | 0.671403000  |
| C | 1.635755000  | -3.970799000 | -0.671403000 |
| C | 1.716550000  | -2.581489000 | 1.102825000  |
| C | 1.716550000  | -2.581489000 | -1.102825000 |
| C | 1.762725000  | -2.159882000 | 2.414886000  |
| C | 1.762725000  | -2.159882000 | -2.414886000 |
| C | 1.878347000  | -0.835319000 | 2.823596000  |
| C | 1.878347000  | -0.835319000 | -2.823596000 |
| C | 2.028401000  | -0.429049000 | 4.239053000  |
| C | 2.028401000  | -0.429049000 | -4.239053000 |
| C | 2.113535000  | 1.381860000  | 2.879302000  |
| C | 2.113535000  | 1.381860000  | -2.879302000 |
| C | 2.167890000  | 0.892399000  | 4.278659000  |
| C | 2.167890000  | 0.892399000  | -4.278659000 |
| C | -1.838101000 | 1.641496000  | 2.875773000  |
| C | -1.838101000 | 1.641496000  | -2.875773000 |
| C | -1.992632000 | 1.172502000  | 4.274603000  |
| C | -1.992632000 | 1.172502000  | -4.274603000 |
| C | -1.998030000 | -0.582381000 | 2.823134000  |
| C | -1.998030000 | -0.582381000 | -2.823134000 |

|   |              |              |              |
|---|--------------|--------------|--------------|
| C | -2.087815000 | -0.153002000 | 4.236843000  |
| C | -2.087815000 | -0.153002000 | -4.236843000 |
| C | -2.113217000 | -1.906929000 | 2.414864000  |
| C | -2.113217000 | -1.906929000 | -2.414864000 |
| C | -2.135321000 | -2.330782000 | 1.102752000  |
| C | -2.135321000 | -2.330782000 | -1.102752000 |
| C | -2.296002000 | -3.713224000 | 0.671359000  |
| C | -2.296002000 | -3.713224000 | -0.671359000 |
| H | 1.604562000  | -4.814644000 | 1.340892000  |
| H | 1.604562000  | -4.814644000 | -1.340892000 |
| H | 1.747968000  | -2.919879000 | 3.183025000  |
| H | 1.747968000  | -2.919879000 | -3.183025000 |
| H | 2.039123000  | -1.130185000 | 5.058777000  |
| H | 2.039123000  | -1.130185000 | -5.058777000 |
| H | 2.071259000  | 2.683250000  | 0.832579000  |
| H | 2.071259000  | 2.683250000  | -0.832579000 |
| H | 2.321763000  | 1.550346000  | 5.117758000  |
| H | 2.321763000  | 1.550346000  | -5.117758000 |
| H | -1.542515000 | 2.912191000  | 0.831848000  |
| H | -1.542515000 | 2.912191000  | -0.831848000 |
| H | -2.036121000 | 1.849073000  | 5.111952000  |
| H | -2.036121000 | 1.849073000  | -5.111952000 |
| H | -2.229269000 | -0.839661000 | 5.056690000  |
| H | -2.229269000 | -0.839661000 | -5.056690000 |
| H | -2.234958000 | -2.657591000 | 3.182696000  |
| H | -2.234958000 | -2.657591000 | -3.182696000 |
| H | -2.409882000 | -4.549908000 | 1.340872000  |
| H | -2.409882000 | -4.549908000 | -1.340872000 |
| N | 1.763162000  | -1.774148000 | 0.000000000  |

|    |              |              |              |
|----|--------------|--------------|--------------|
| N  | 1.904054000  | 0.233354000  | 2.020552000  |
| N  | 1.904054000  | 0.233354000  | -2.020552000 |
| N  | -1.827499000 | 0.472816000  | 2.019797000  |
| N  | -1.827499000 | 0.472816000  | -2.019797000 |
| N  | -2.039503000 | -1.527757000 | 0.000000000  |
| O  | 1.730355000  | 2.286482000  | 0.000000000  |
| O  | 2.231403000  | 2.519040000  | 2.494816000  |
| O  | 2.231403000  | 2.519040000  | -2.494816000 |
| O  | -1.277287000 | 2.459603000  | 0.000000000  |
| O  | -1.745044000 | 2.780547000  | 2.489960000  |
| O  | -1.745044000 | 2.780547000  | -2.489960000 |
| Pt | 1.835005000  | 0.227946000  | 0.000000000  |
| Pt | -1.754575000 | 0.454739000  | 0.000000000  |
